# Supplementary material for: Prescriptive variability of drugs by general practitioners
Source: PubMed Central journal article supplement (PMC5819764; doi:10.1371/journal.pone.0189599), 2018-02-20
Supplement: pone.0189599.s001.pdf [file pone.0189599.s001.pdf]

**S1 Table. The variance in prescribing rates for the data set with and without outlier practices.**

|                                  | Apr-<br>Jun<br>2013 | Jul-<br>Sep<br>2013 | Oct-<br>Dec<br>2013 | Jan-<br>Mar<br>2014 | Apr-<br>Jun<br>2014 | Jul-<br>Sep<br>2014 | Oct-<br>Dec<br>2014 | Jan-<br>Mar<br>2015 | Apr-<br>Jun<br>2015 | Jul-<br>Sep<br>2015 | Oct-<br>Dec<br>2015 | Jan-<br>Mar<br>2016 |
|----------------------------------|---------------------|---------------------|---------------------|---------------------|---------------------|---------------------|---------------------|---------------------|---------------------|---------------------|---------------------|---------------------|
| <i>With outlier practices</i>    |                     |                     |                     |                     |                     |                     |                     |                     |                     |                     |                     |                     |
| $\sigma^2$ (£)                   | 0.70                | 0.67                | 0.71                | 0.69                | 0.72                | 0.71                | 0.70                | 0.72                | 0.85                | 0.81                | 0.85                | 0.77                |
| <i>Without outlier practices</i> |                     |                     |                     |                     |                     |                     |                     |                     |                     |                     |                     |                     |
| $\sigma^2$ (£)                   | 0.52                | 0.39                | 0.59                | 0.43                | 0.45                | 0.44                | 0.49                | 0.50                | 0.60                | 0.58                | 0.59                | 0.56                |
